# Supplementary material for: CRISPR/Cas9 nickase-mediated disruption of hepatitis B virus open reading frame S and X
Source: PubMed Central journal article supplement (PMC4558539; doi:10.1038/srep13734), 2015-09-03
Supplement: srep13734-s1.pdf [file srep13734-s1.pdf]

## **Supplementary Information**

### **CRISPR/Cas9 nickase-mediated disruption of hepatitis B virus open reading frame S and X**

Madina Karimova, Niklas Beschorner, Werner Dammermann, Jan Chemnitz, Daniela Indenbirken, Jan-Hendrik Bockmann, Adam Grundhoff, Stefan Lüth, Frank Buchholz, Julian Schulze zur Wiesch & Joachim Hauber

#### **Context of supplementary information**

1. Supplementary Figure legends
2. Supplementary Figure 1
3. Supplementary Figure 2
4. Supplementary Figure 3
5. Supplementary Figure 4
6. Supplementary Figure 5
7. Supplementary Table 1

**Supplementary Figure 1 HBV reporter construct.** The reporter plasmid for detecting Cas9n nuclease activity on HBV S or X target sequences was integrated into the genome of HEK293 or HeLa cells using the PiggyBac system (System Biosciences Inc.) to generate stable cell lines containing HBV reporters. Cells cotransfected with PiggyBac-HBV reporters and transposase were selected on puromycin and assessed for constitutive RFP expression.

**Supplementary Figure 2 Distribution of deletion and insertion lengths.** Distribution among indel amplicon reads derived from S-specific sgRNA expressing (A) HepG2-H1.3 and (B) HepG2.2.15 cells. The total length of individual deletions (red, upper graphs in each panel) or insertions (green, lower graphs in each panel) is shown in bins with 5 nucleotide increments. The bar height represents the total number of observed reads (log scale) with deletions/insertions of the given length. The '0'-value column represents reads without deletions or insertions.

**Supplementary Figure 3 Distribution of deletion and insertion lengths.** Distribution among indel amplicon reads derived from X-specific sgRNA expressing (A) HepG2-H1.3 and (B) HepG2.2.15 cells, as in Supplementary Figure 3.

**Supplementary Figure 4 Consensus sequence of ORF S of HBV genotype A.** Nucleotides appearing among isolates at a frequency higher than 0.01% are indicated below the consensus sequence. These positions in the consensus are referred to as semi-conserved and used to calculate the conservation of gRNA+PAM sequences. S-specific sgRNAs (i.e. sgRNA-S1, sgRNA-S2) are boxed, PAM sequences are boxed in gray.

**Supplementary Figure 5 Consensus sequence of ORF X of HBV genotype A.**

Nucleotides appearing among isolates at a frequency higher than 0.01% are indicated below the consensus sequence. These positions in the consensus are used to calculate the conservation of gRNA+PAM sequences as in Figure S1. X-specific sgRNAs (i.e. sgRNA-X1, sgRNA-X2) are boxed, PAM sequences are boxed in gray.

### Supplementary Figure 1

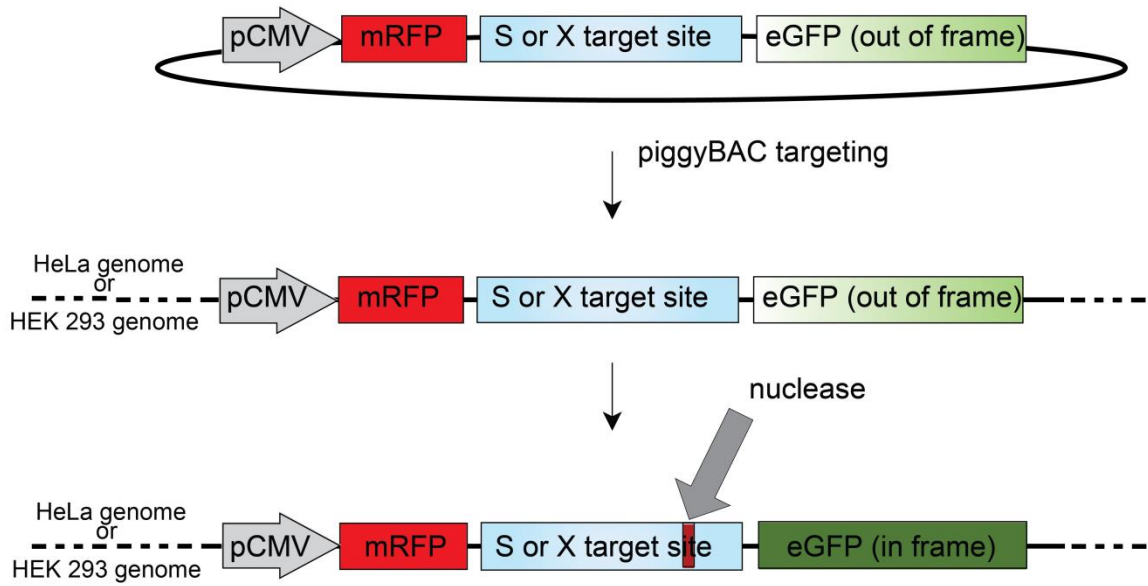

Supplementary Figure 2

A

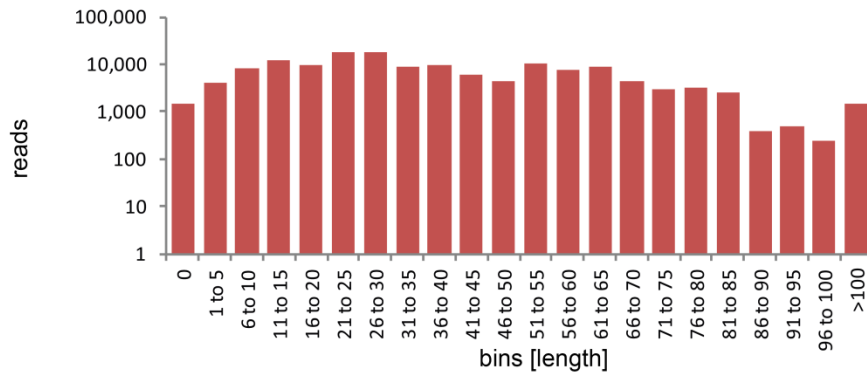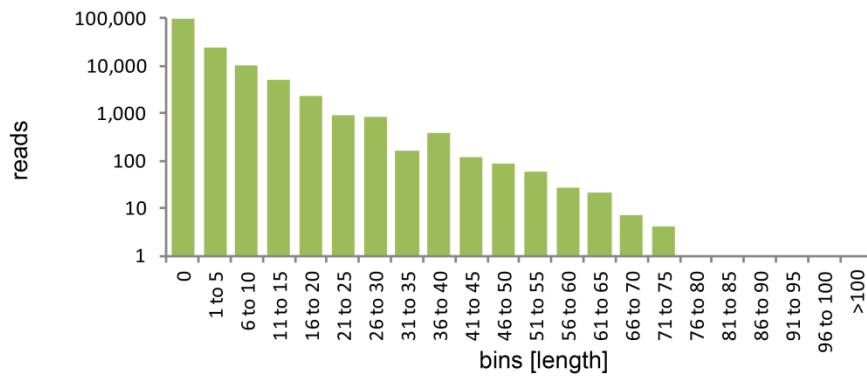

B

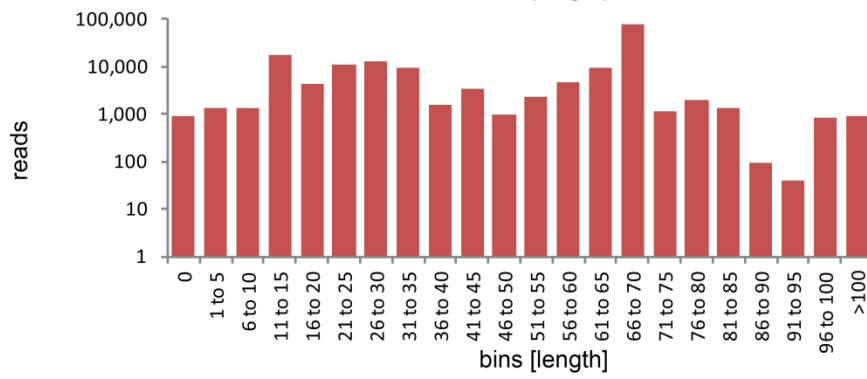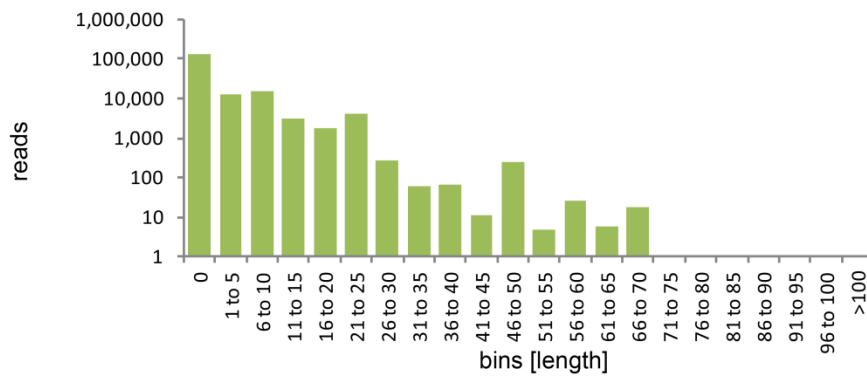

Supplementary Figure 3

A

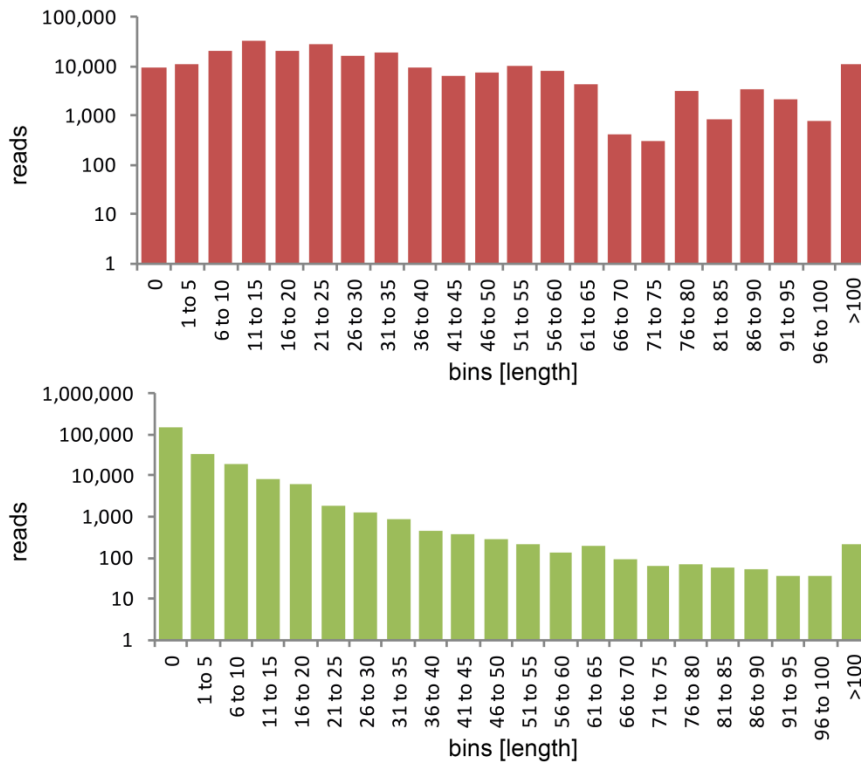

B

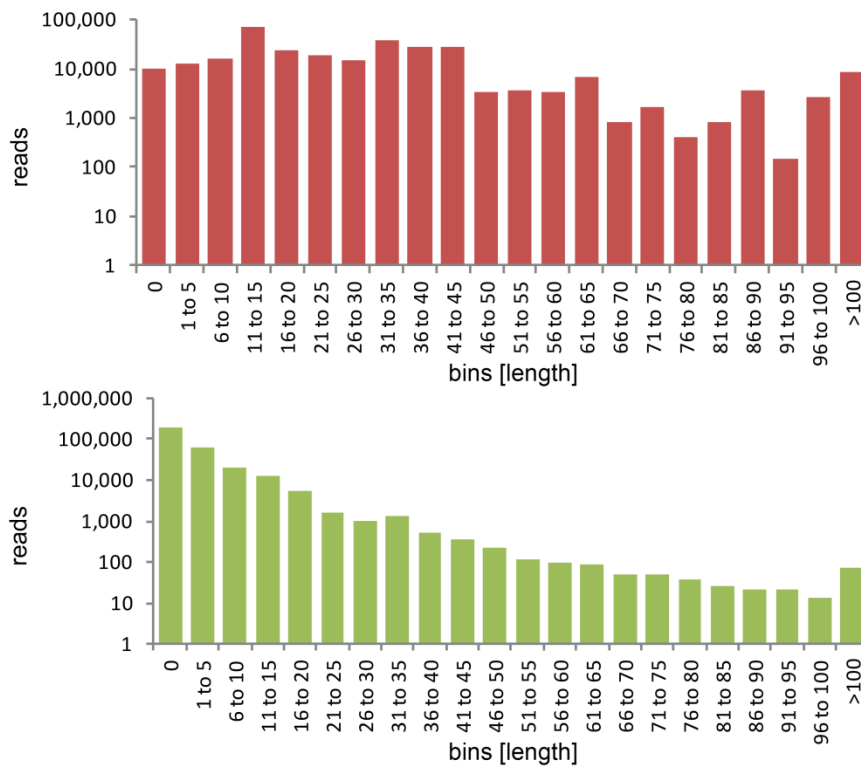

### Supplementary Figure 4

Consensus sequence of HBV protein S

```

.....|.....|.....|.....|.....|.....|.....|.....|.....|.....|
*      *      *      *      *      *      *      *      *      *
10    20    30    40    50    60    70    80
ATGGAGAACATCACATCAGGATTCCTAGGACCCTSCTCGTGTTACAGGCGGGTTTTCTTGTGACAAGAATCCCTCAC
      c      c      a
.....|.....|.....|.....|.....|.....|.....|.....|.....|.....|
*      *      *      *      *      *      *      *      *      *
90   100  110  120  130  140  150  160
AATACCGCAGAGTCTAGACTCGTGGFGGACTTCTCTCAATTTTCTAG-GGGGatCACCCGTGTGCTTGGCCAAAATTCG
      a      g      agg ta      g
                      cc
                      a
.....|.....|.....|.....|.....|.....|.....|.....|.....|.....|
*      *      *      *      *      *      *      *      *      *
170  180  190  200  210  220  230  240
CAGTCCCAACCTCCAATCACTCACCAACCTCCTGCTCTCCAATTTGTCCTGGTTATCGTGGATGTGTCTGCGGGCTTT
      t      c      c      t
.....|.....|.....|.....|.....|.....|.....|.....|.....|.....|
*      *      *      *      *      *      *      *      *      *
250  260  270  280  290  300  310  320
TATCATATTCTCTTCATCTGC--TGCTATGCCTCATCTTCTTATTGGTTCTTCTGGATTATCAAGGTATGTTGCCCG
r      c      g      g      g      gc      g
.....|.....|.....|.....|.....|.....|.....|.....|.....|.....|
*      *      *      *      *      *      *      *      *      *
330  340  350  360  370  380  390  400
TTTGCTCTAATCCAGGATCa-----ACAACAACCAAGtACGGGACcATGCAaAACCTGCACGACTCCTGCCTCAAGGC
      c      g      g      c      c      a      c      gg
                      t
.....|.....|.....|.....|.....|.....|.....|.....|.....|.....|
*      *      *      *      *      *      *      *      *      *
410  420  430  440  450  460  470  480
AACTCTATGTTCCCTCATGTTGCTGTACAAAACCTACGGAtGGAATTCACCTGTATTCCCATCCCATCgTCcTGGGC
      aa      c      t      c      tt      cc      t      a      a      t
.....|.....|.....|.....|.....|.....|.....|.....|.....|.....|
*      *      *      *      *      *      *      *      *      *
490  500  510  520  530  540  550  560
TTTCGAAAATACCTATGGGAGTGGGCTCAGTCCGTTCTCtTGCTCAGTTACTAGTGCCATTGTTcAGTGGTTCG
      t      g      c      a
.....|.....|.....|.....|.....|.....|.....|.....|.....|.....|
*      *      *      *      *      *      *      *      *      *
570  580  590  600  610  620  630  640
TAGGGCTTTCCCCACTGTTTGGCTTTCAGcTATaTGGATGATGTGGTAtTGGGGCCAAAGTCTGTACAgCATCgTGAGt
c      t      c      t      t      g      t      a      t      c      aa      ct      a      c      t      ag
                      t      c      r
.....|.....|.....|.....|.....|.....|.....|.....|.....|.....|
*      *      *      *      *      *      *      *      *      *
650  660  670  680  690
CCCTTTATACCGCTGTTACCAATTTCTTTTGTCTcTGGGTATACATTTAA
      t      t      a      t      t      c      ac---

```





**Supplementary Table 1 Conservation of target sites.** Upper panel: Percentage conservation of the 23 nt (20 nt complementary to gRNA plus 3 nt PAM sequence) in sgRNA/Cas9 target sequences S1, S2, X1 and X2 among the HBV genotypes B, C, D, E, F and G. Lower panel: DNA sequences of the gRNA binding sites in the conserved HBV regions. PAM motifs are oriented on the right-hand side and are highlighted by grey boxes. Positions with non-conserved nucleotides are indicated in italic. Non-conserved nucleotides appearing with a frequency of more than 1% are indicated underneath in lower case.

| Conservation of 23 nucleotides sequence<br>(20 gRNA + 3 PAM) in HBV genotypes, % |       |      |       |       |
|----------------------------------------------------------------------------------|-------|------|-------|-------|
|                                                                                  | ORF S |      | ORF X |       |
| genotype                                                                         | S1    | S2   | X1    | X2    |
| A                                                                                | 100.0 | 95.3 | 100.0 | 100.0 |
| B                                                                                | 95.9  | 98.1 | 97.9  | 93.3  |
| C                                                                                | 97.5  | 98.4 | 96.9  | 98.4  |
| D                                                                                | 89.1  | 95.5 | 100.0 | 100.0 |
| E                                                                                | 99.0  | 98.8 | 95.0  | 98.0  |
| F                                                                                | low   | low  | low   | low   |
| G                                                                                | 93.7  | 90.3 | 97.7  | 62.0  |
| H                                                                                | low   | low  | low   | low   |

HBV-S1      **ACCCCGCCTGTAACACGAGC** **AGG**

HBV-S2      **TACCGCAGAGTCTAGACTCG** **TGG**  
                  a

HBV-X1      **GTCTGTGCCTTCTCATCTGC** **CGG**

HBV-X2      **GTAAAGAGAGGTGCGCCCCG** **TGG**
